# Supplementary material for: Speech input and output technology - State of the art and selected applications
Source: Royal Society of Chemistry journal article supplement (doi:10.1039/c7cp03859c), 2003-01-01
Supplement: c7cp03859c1.pdf [file c7cp03859c1.pdf]

## DFT Study of CO<sub>2</sub> Conversion on InZr<sub>3</sub>(110) Surface

Minhua Zhang<sup>a,b</sup>, Maobin Dou<sup>a,b</sup>, Yingzhe Yu<sup>a,b,\*</sup>

<sup>a</sup> Key Laboratory for Green Chemical Technology of Ministry of Education, R&D center for Petrochemical Technology, Tianjin University, Tianjin 300072, PR China

<sup>b</sup> Collaborative Innovation Center of Chemical Science and Engineering (Tianjin), Tianjin 300072, PR China

Table S1. The effect of the thickness of the slab on the adsorption energy of CO species on InZr<sub>3</sub>(110) surface.

| Thickness of slab    | 4     | 5     | 6     |
|----------------------|-------|-------|-------|
| Adsorption energy/eV | -2.92 | -2.90 | -2.88 |

Table S2. The effect of the number of the k-points on the adsorption energy of CO species on InZr<sub>3</sub>(110) surface.

| k-point              | 3 × 2 × 2 | 4 × 3 × 2 | 5 × 4 × 3 |
|----------------------|-----------|-----------|-----------|
| Adsorption energy/eV | -2.92     | -2.90     | -2.91     |
